# Supplementary material for: Advancement into the Arctic Region for Bioactive Sponge Secondary Metabolites
Source: PubMed Central journal article supplement (PMC3229243; doi:10.3390/md9112423), 2011-11-21

# Supplemental Information

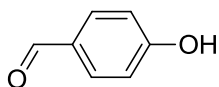

**20**  
4-hydroxybenzaldehyde  
Chemical Formula:  $C_7H_6O_2$   
Exact Mass: 122.0

**Predicted  $^1H$  NMR  $\delta$ :**  
9.88 (s, 1H), 7.82 (d, J = 7.5, 2H), 6.89 (d, J = 7.5, 2H), 5.35 (bs, 1H)

**Experimental  $^1H$  NMR  $\delta$ :**  
(400 MHz,  $CDCl_3$ ) 9.88 (s, 1H), 7.81 (d, J = 8.3 Hz, 2H), 6.95 (d, J = 8.3 Hz, 2H), 5.41 (bs, 1H)

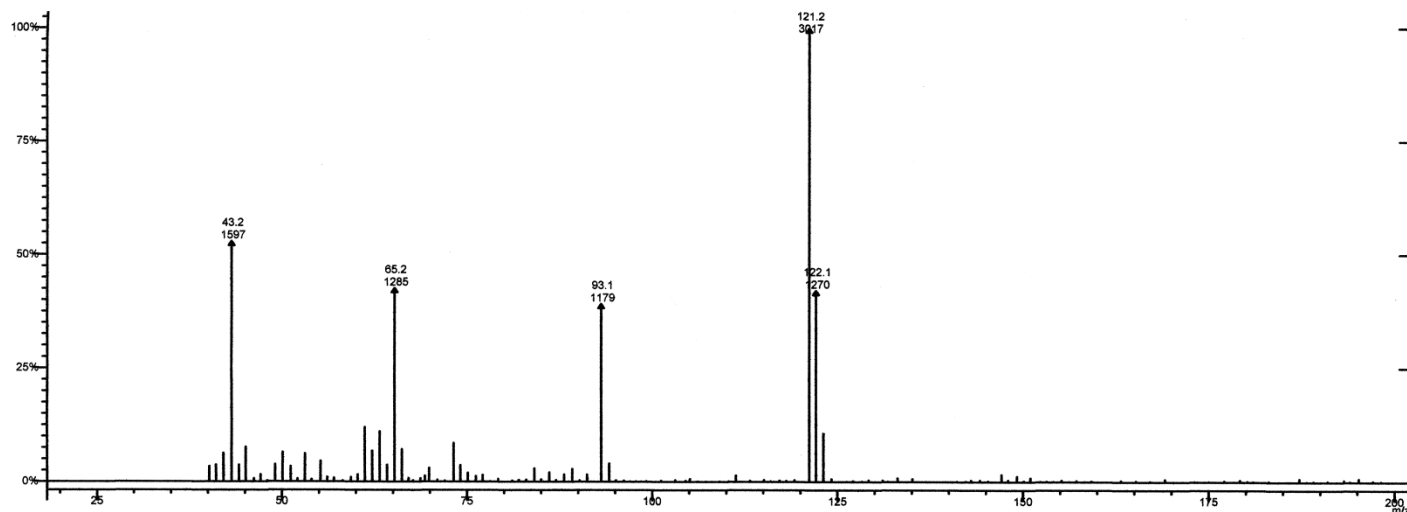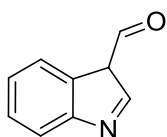

**21**  
indole-3-carboxyaldehyde  
Chemical Formula:  $C_9H_7NO$   
Exact Mass: 145.1

**Predicted  $^1H$  NMR  $\delta$ :**  
9.72 (d, J = 6.2, 1H), 7.50 (d, J = 6.2, 1H), 7.33 (dd, J = 7.5, 1H), 7.26 (dd, J = 7.5, 1H), 7.23 (d, J = 7.5, 1H), 7.01 (d, J = 7.5, 1H), 3.6 (dd, J = 7, 1H)

**Experimental  $^1H$  NMR  $\delta$ :**  
(400 MHz,  $CDCl_3$ ) 10.0 (s, 1H), 8.33 (m, 1H), 7.85 (bd, 1H), 7.45 (m, 1H), 7.33 (m, 2H), 1.25 (s, 1H)

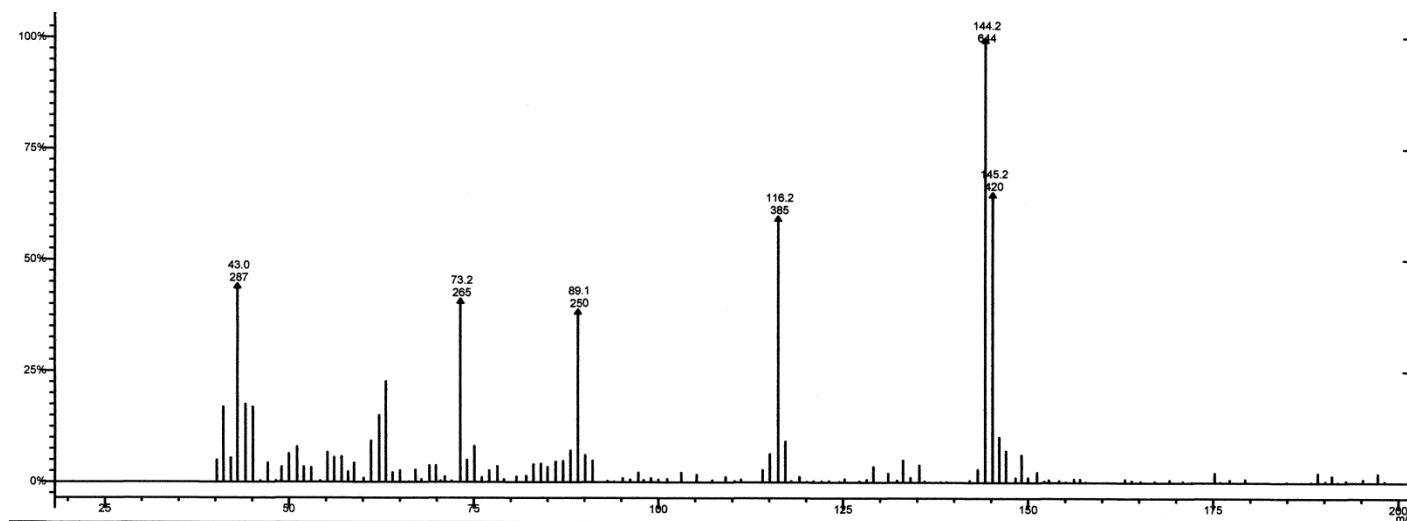

Supplement: marinedrugs-09-02423-s001.pdf [file marinedrugs-09-02423-s001.pdf]
